# Supplementary material for: Two-dimensional ferroelastic semiconductors in single-layer indium oxygen halide InOY (Y = Cl/Br)
Source: Royal Society of Chemistry journal article supplement (doi:10.1039/c9cp00011a), 2019-01-01
Supplement: c9cp00011a1.pdf [file c9cp00011a1.pdf]

## **Supporting Information**

# **Two-Dimensional Ferroelastic Semiconductors in Single-Layer Indium Oxygen Halide InOY (Y=Cl/Br)**

Xilong Xu, Yandong Ma,\* Baibiao Huang, and Ying Dai\*

School of Physics, State Key Laboratory of Crystal Materials, Shandong University, Shandan  
Street 27, Jinan 250100, China

\*Corresponding author: yandong.ma@sdu.edu.cn (Y.M.); daiy60@sina.com (Y.D.)

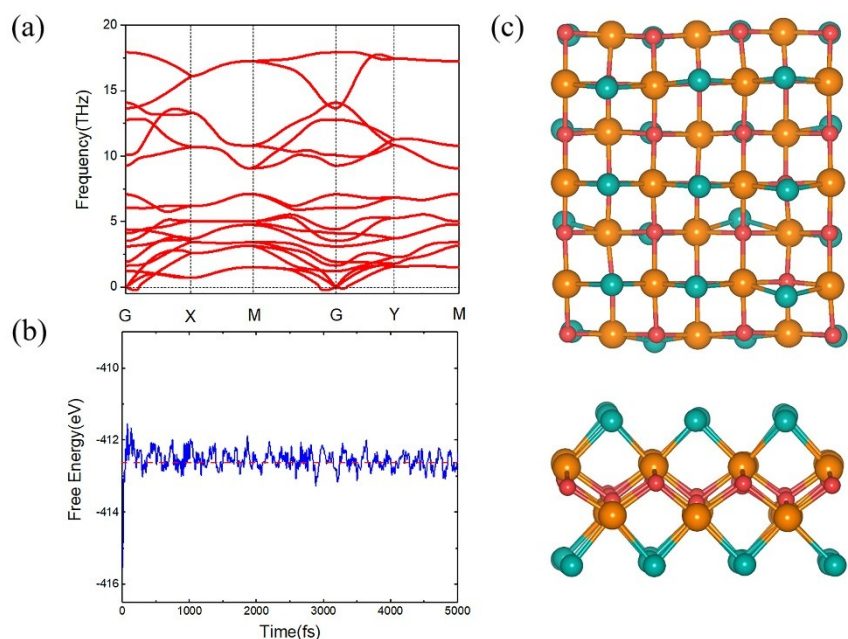

**Fig. S1.** (a) The phonon bands of SL InOBr. (b) The variation of total energy during AIMD (500 K, 5 ps) simulations. (c) Crystal structure of SL InOCl taken from the end of AIMD.

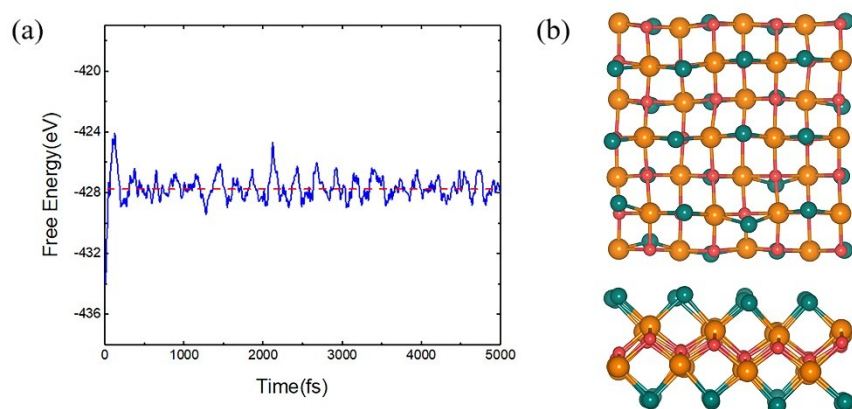

**Fig. S2.** (a) The variation of total energy during AIMD (500 K, 5 ps) simulations. (b) Crystal structure of SL InOCl taken from the end of AIMD.

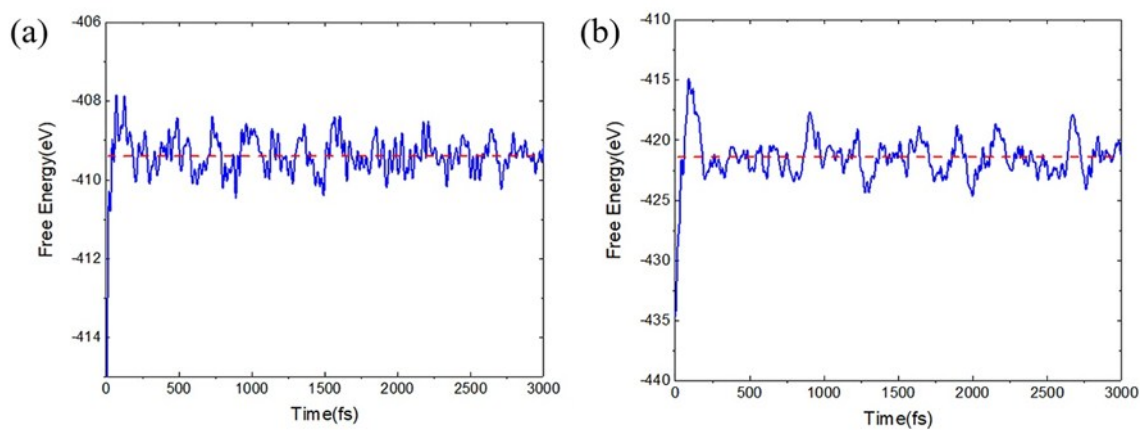

**Fig. S3.** The variation of total energy during AIMD (1000 K, 3 ps) simulations of InOBr (a), InOCl (b).

We perform the AIMD simulations in Fig. S1, Fig. S2 and Fig. S3. For the AIMD simulation (5 ps at 500 K and 3 ps at 1000K), neither of InOCl and InOBr broken bond nor geometry reconstruction is observed for both systems; see Fig. S2b and Fig. S1c. And the fluctuation of total energy is shown in Fig. S2a and Fig. S1b. These results confirm that SL InOY is thermally local minimal.

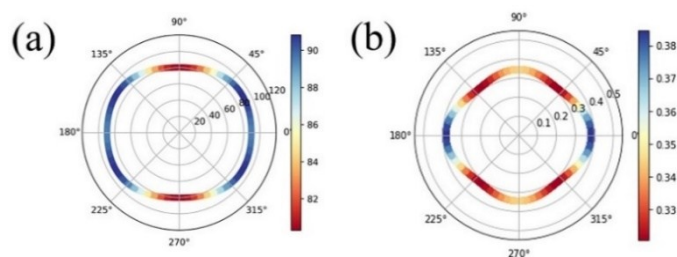

**Fig. S4.** (a) Young's modulus and (b) Poisson's ration of InOBr as a function of the angle  $\theta$ .  $\theta = 0^\circ$  corresponds to the a axis.

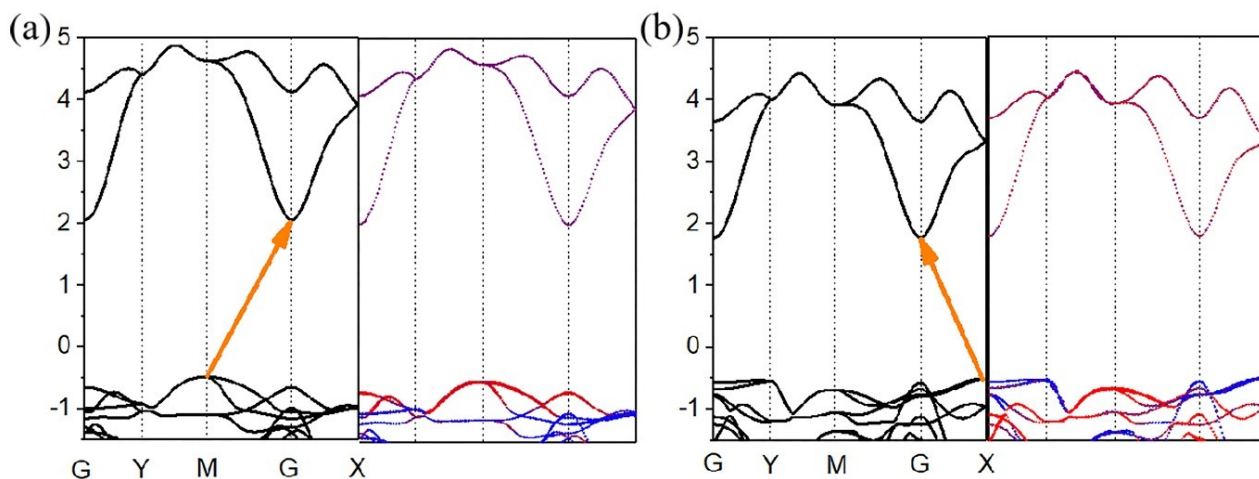

**Fig. S5.** The band structure and the fat band structure of InOCl (a) and InOBr (b). Purple: In; Red: O; Blue: Cl or Br.

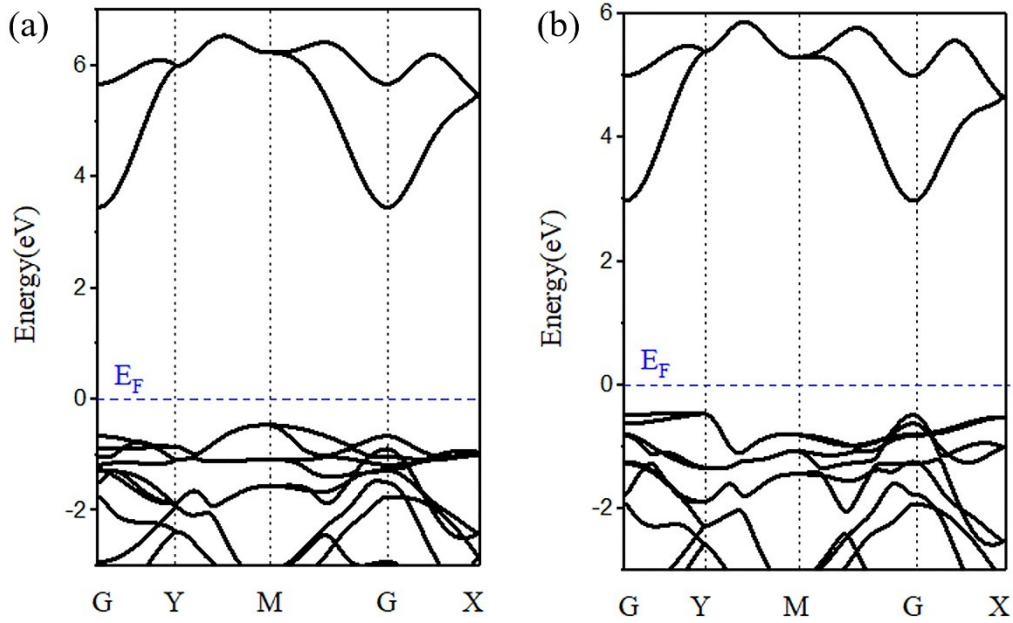

**Fig. S6.** The band structures of SL InOCl (a) and InOBr (b) calculated by the HSE06 method.

### The lattice parameters and atomic position coordinates SL InOYs.

#### InOCl

|   |                    |                    |                     |
|---|--------------------|--------------------|---------------------|
| a | 3.5738492593467126 | 0.0000000000000000 | 0.0000000000000000  |
| b | 0.0000000000000000 | 4.2070566146559161 | 0.0000000000000000  |
| c | 0.0000000000000000 | 0.0000000000000000 | 21.0560965682156862 |

|    |      |      |                    |
|----|------|------|--------------------|
| O  | 0.25 | 0.25 | 0.4823615354942151 |
| O  | 0.75 | 0.75 | 0.5176384645057849 |
| Cl | 0.75 | 0.75 | 0.3650538220037595 |
| Cl | 0.25 | 0.25 | 0.6349461779962405 |
| In | 0.75 | 0.25 | 0.5476018644370646 |
| In | 0.25 | 0.75 | 0.4523981355629353 |

#### InOBr

|   |                    |                    |                     |
|---|--------------------|--------------------|---------------------|
| a | 3.6753612768970489 | 0.0000000000000000 | 0.0000000000000000  |
| b | 0.0000000000000000 | 4.1847440686720478 | 0.0000000000000000  |
| c | 0.0000000000000000 | 0.0000000000000000 | 21.7182952632748005 |

|    |      |      |                    |
|----|------|------|--------------------|
| O  | 0.25 | 0.25 | 0.4849400114956369 |
| O  | 0.75 | 0.75 | 0.5150599885043630 |
| Br | 0.75 | 0.75 | 0.3624338252215629 |
| Br | 0.25 | 0.25 | 0.6375661747784370 |
| In | 0.75 | 0.25 | 0.5459760384390236 |
| In | 0.25 | 0.75 | 0.4540239615609769 |
